# Supplementary material
Source: publisher figshare collection journal article supplement (https://sage.figshare.com/ndownloader/files/12560060)
Supplement: Supplementary file 1 [file 12560060]

## Measuring Teaching Quality of Secondary Mathematics and Science Residents: A Classroom Observation Framework

This study assesses the reliability of two observation rubrics, one in math and the other in science and documents how the rubric data were used to inform a teacher education program. Classroom observations are typically considered essential for assessing teaching practice, yet many popular observation frameworks while comprehensive in aim, do not appropriately capture key features of teaching valued by teacher education programs. Many of these tools do not attend to issues of equity, humanizing pedagogy and thus, social justice. We report on the development of two observation rubrics—secondary math and science—that embody the aims and values of our teacher education program, specifically, equity and humanizing pedagogy, and the results of our examination of the reliability of ratings of teaching practice generated using these rubrics. We discuss the various sources of measurement error and the implications for further developing and using the observation rubric in our program.

### 中学科学和数学的教学质量测量：课堂观察框架

本文评估数学和科学课堂观察标准的信度，以及这些数据如何被用来改善教师教育。课堂观察一直被视是评估教学实践的代表性方式。但是，许多眼下流行的课堂观察框架并没有恰当的捕捉到教师教育目标所重视的教学特征，虽然这些框架旨在符合性教学。许多相关观察手段没有关注公平、人性化教学以及社会正义。我们评估数学、科学两种观察标准的开发过程。这两种标准体现了教师教育目的的目标和价值：公平和人性化教学。同时，我们评估了通常使用这些观察标准来评估教师的教学行为的信度。我们评估了测量的多种来源，和未来开发使用课堂观察标准的意义。
